# Supplementary material for: Assembly of Zn/Cd coordination polymers containing helixes or polycatenane structures tuned by the tri-pyridyl–bis-amide ligands with different spacer: syntheses, structures, photoluminescent and photocatalytic properties
Source: Royal Society of Chemistry journal article supplement (doi:10.1039/c2ce26892b), 2013-01-01
Supplement: c2ce26892b.pdf [file c2ce26892b.pdf]

Supplementary Material (ESI) for CrystEngComm  
This journal is © The Royal Society of Chemistry

---

**Assembly of Zn/Cd coordination polymers containing helices or polycatenane structures tuned by the tri-pyridyl-bis-amide ligands with different spacer: syntheses, structures, photoluminescent and photocatalytic properties †**

Xiuli Wang\*, Jingjing Huang, Lianli Liu, Guocheng Liu, Hongyan Lin, Juwen Zhang, Naili Chen and Yun Qu

*Department of Chemistry, Bohai University, Liaoning Province Silicon Materials Engineering Technology Research Centre, Jinzhou, 121000, P. R. China*

**ELECTRONIC SUPPLEMENTARY INFORMATION**

**Table S1.** Selected bond lengths (Å) and angles (°) for complexes 1–4.

| 1                 |            |                   |            |
|-------------------|------------|-------------------|------------|
| Zn(1)-O(1)        | 1.9462(18) | Zn(1)-O(2)        | 1.9606(17) |
| Zn(1)-N(5)#1      | 2.063(2)   | Zn(1)-N(1)        | 2.084(2)   |
| O(1)-Zn(1)-O(2)   | 102.97(8)  | O(1)-Zn(1)-N(5)#1 | 121.56(9)  |
| O(2)-Zn(1)-N(5)#1 | 109.48(8)  | O(1)-Zn(1)-N(1)   | 110.07(9)  |
| O(2)-Zn(1)-N(1)   | 115.04(8)  | N(5)#1-Zn(1)-N(1) | 98.37(8)   |

Symmetry transformations used to generate equivalent atoms: #1  $x - 1, y, z$

| 2                 |            |                   |           |
|-------------------|------------|-------------------|-----------|
| Cd(1)-O(1)        | 2.2476(18) | Cd(1)-O(4)        | 2.292(2)  |
| Cd(1)-O(3)        | 2.382(2)   | Cd(1)-O(3)#1      | 2.614(2)  |
| Cd(1)-N(5)        | 2.431(2)   | Cd(1)-N(1)        | 2.353(2)  |
| O(1)-Cd(1)-O(4)   | 140.31(8)  | O(1)-Cd(1)-N(1)   | 131.30(7) |
| O(4)-Cd(1)-N(1)   | 86.11(7)   | O(1)-Cd(1)-O(3)   | 91.12(7)  |
| O(4)-Cd(1)-O(3)   | 92.93(7)   | N(1)-Cd(1)-O(3)   | 102.31(8) |
| O(1)-Cd(1)-N(5)   | 85.93(8)   | O(4)-Cd(1)-N(5)   | 82.32(8)  |
| N(1)-Cd(1)-N(5)   | 87.98(8)   | O(3)-Cd(1)-N(5)   | 168.40(7) |
| O(1)-Cd(1)-O(3)#1 | 90.75(7)   | O(4)-Cd(1)-O(3)#1 | 53.52(6)  |
| N(1)-Cd(1)-O(3)#1 | 137.95(7)  | O(3)-Cd(1)-O(3)#1 | 72.18(7)  |
| N(5)-Cd(1)-O(3)#1 | 96.61(7)   |                   |           |

**Supplementary Material (ESI) for CrystEngComm**  
**This journal is © The Royal Society of Chemistry**

---

Symmetry transformations used to generate equivalent atoms: #1  $-x + 2, -y, -z$

**3**

|                   |            |                   |            |
|-------------------|------------|-------------------|------------|
| Zn(1)-O(1)        | 1.927(3)   | Zn(1)-O(2)        | 1.969(3)   |
| Zn(1)-N(1)        | 2.057(3)   | Zn(1)-N(5)#1      | 2.071(3)   |
| O(1)-Zn(1)-O(2)   | 129.26(13) | O(1)-Zn(1)-N(1)   | 97.54(13)  |
| O(2)-Zn(1)-N(1)   | 112.23(13) | O(1)-Zn(1)-N(5)#1 | 114.77(14) |
| O(2)-Zn(1)-N(5)#1 | 92.17(12)  | N(1)-Zn(1)-N(5)#1 | 111.15(13) |

Symmetry transformations used to generate equivalent atoms: #1  $-x, -y, -z$

**4**

|                   |            |                   |            |
|-------------------|------------|-------------------|------------|
| Cd(1)-O(1)        | 2.3021(16) | Cd(1)-O(3)        | 2.3204(17) |
| Cd(1)-N(5)        | 2.3350(19) | Cd(1)-N(1)        | 2.365(2)   |
| Cd(1)-O(2)        | 2.4528(16) | Cd(1)-O(4)        | 2.5283(17) |
| Cd(1)-N(3)#1      | 2.6091(19) |                   |            |
| O(1)-Cd(1)-O(3)   | 139.95(6)  | O(1)-Cd(1)-N(5)   | 123.37(7)  |
| O(3)-Cd(1)-N(5)   | 86.30(6)   | O(1)-Cd(1)-N(1)   | 88.97(6)   |
| O(3)-Cd(1)-N(1)   | 87.59(7)   | N(1)-Cd(1)-N(1)   | 132.88(7)  |
| O(1)-Cd(1)-O(2)   | 54.94(5)   | O(3)-Cd(1)-O(2)   | 110.50(6)  |
| N(5)-Cd(1)-O(2)   | 83.63(6)   | N(1)-Cd(1)-O(2)   | 141.35(6)  |
| O(1)-Cd(1)-O(4)   | 86.29(6)   | O(3)-Cd(1)-O(4)   | 53.66(6)   |
| N(5)-Cd(1)-O(4)   | 126.35(6)  | N(1)-Cd(1)-O(4)   | 84.57(7)   |
| O(2)-Cd(1)-O(4)   | 80.18(6)   | O(1)-Cd(1)-N(3)#1 | 80.39(6)   |
| O(3)-Cd(1)-N(3)#1 | 135.51(7)  | N(5)-Cd(1)-N(3)#1 | 79.92(6)   |
| N(1)-Cd(1)-N(3)#1 | 72.42(7)   | O(2)-Cd(1)-N(3)#1 | 109.70(6)  |
| O(4)-Cd(1)-N(3)#1 | 153.46(6)  |                   |            |

Symmetry transformations used to generate equivalent atoms: #1  $-x + 1, -y + 1, -z + 1$

---

**Table S2.** The twist degrees of the  $L_1$  and  $L_2$  ligands in complexes **1–4**.

| complex    | <b>1</b> | <b>2</b> | <b>3</b> | <b>4</b> |
|------------|----------|----------|----------|----------|
| $\theta_1$ | 26.02    | 27.41    | 63.30    | 27.66    |
| $\theta_2$ | 52.92    | 52.99    | 10.23    | 72.15    |
| $\theta_3$ | 70.82    | 73.25    | 73.06    | 81.61    |

---

**Supplementary Material (ESI) for CrystEngComm**  
**This journal is © The Royal Society of Chemistry**

---

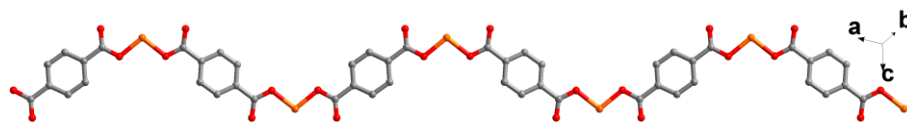

**Fig. S1** The 1D zigzag Zn-BDC chain in complex **1**.

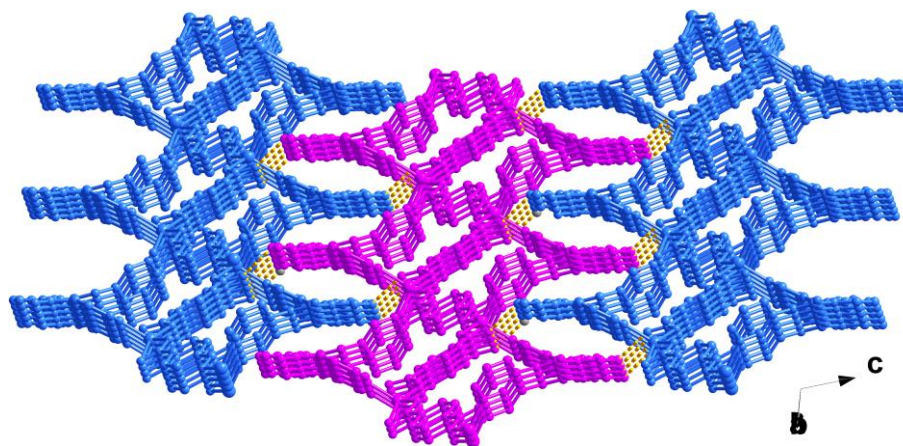

**Fig. S2** The 3D supramolecular framework formed by hydrogen-bonding interactions.

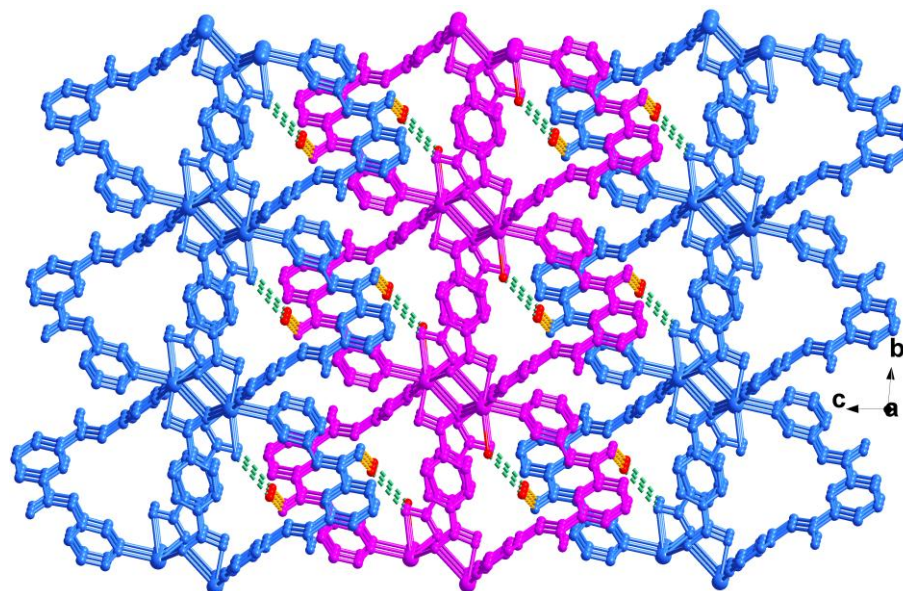

**Fig. S3** The 3D supramolecular framework of **2** constructed by hydrogen-bonding interactions.

Supplementary Material (ESI) for CrystEngComm  
This journal is © The Royal Society of Chemistry

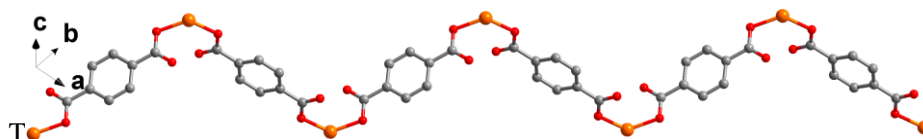

Fig. S4 1D Zn-BDC zigzag chain in complex 3.

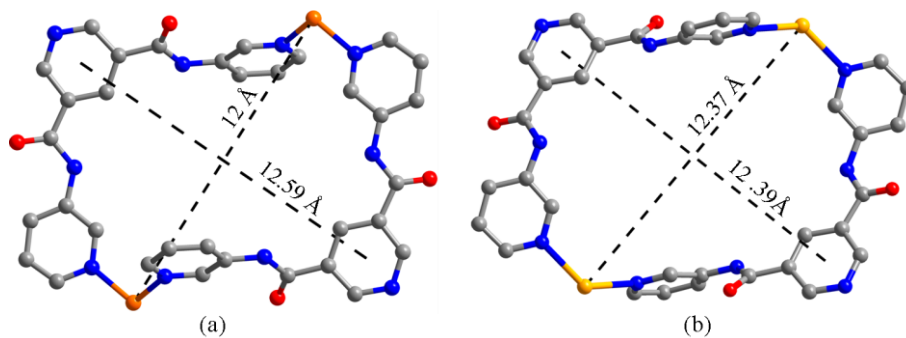

Fig. S5 (a) The special 28-membered loop of 3. (b) The special 28-membered loop of 4.

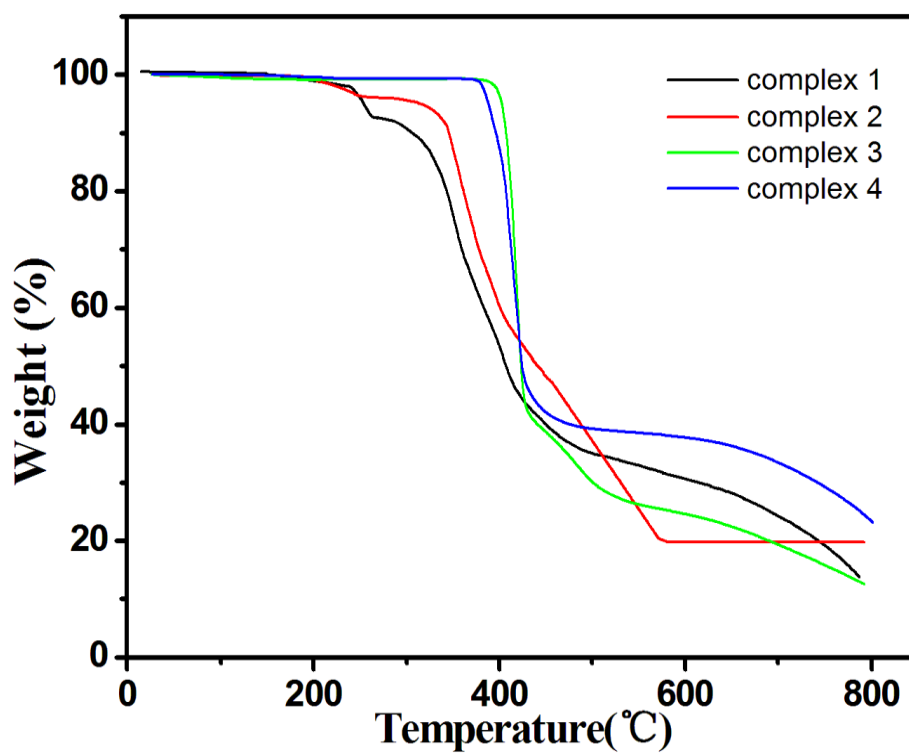

Fig. S6 The TG curves of complexes 1-4.

Supplementary Material (ESI) for CrystEngComm  
This journal is © The Royal Society of Chemistry

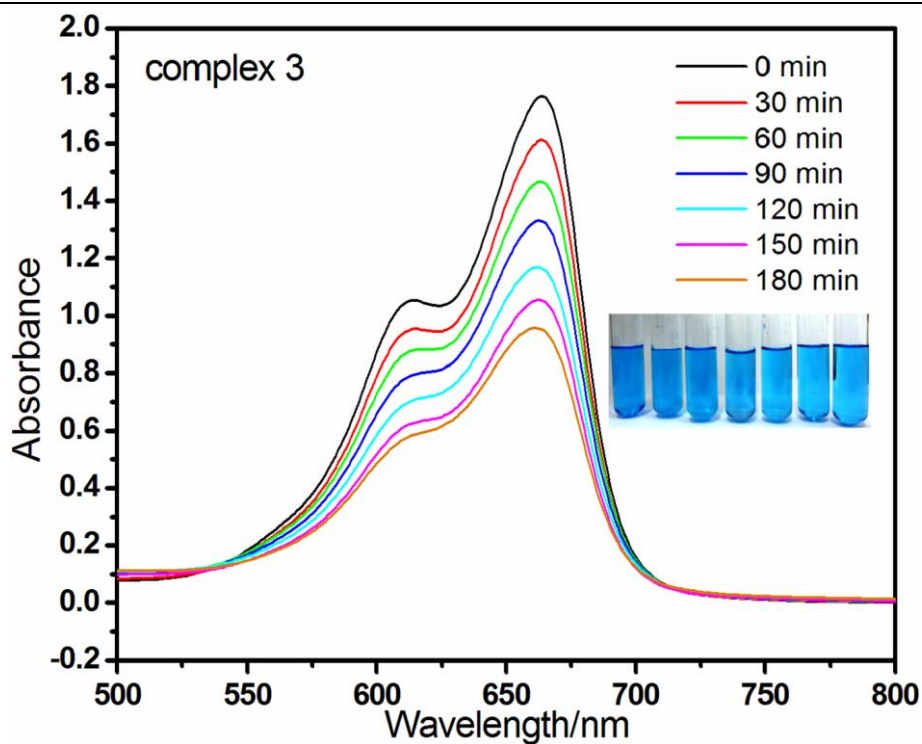

Fig. S7 Absorption spectra of the MB solution during the decomposition reaction under UV irradiation with the presence of complex 3.

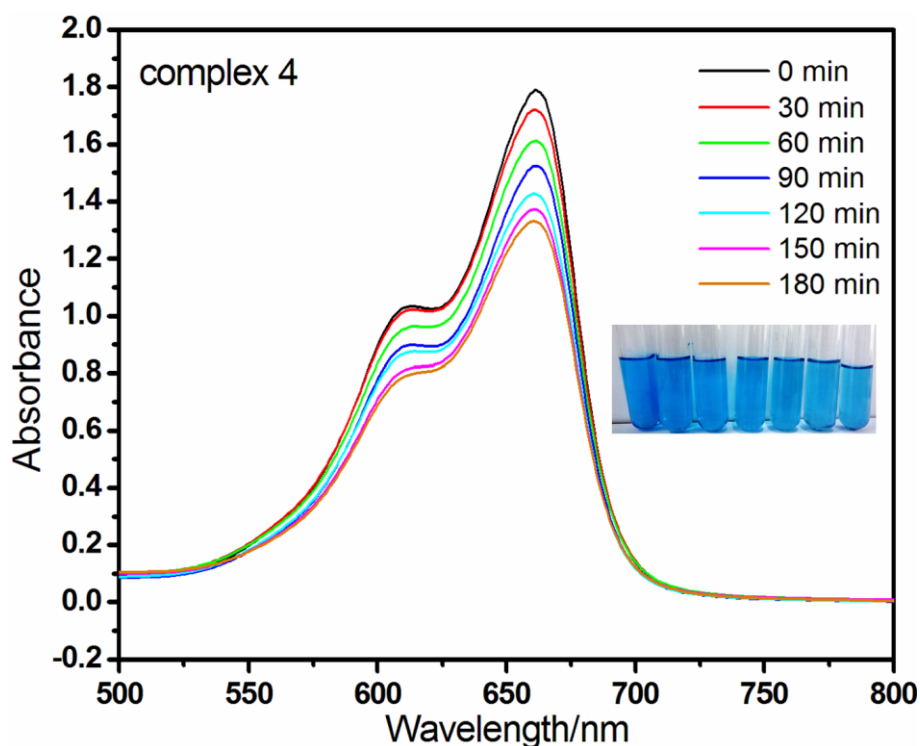

Fig. S8 Absorption spectra of the MB solution during the decomposition reaction under UV irradiation with the presence of complex 4.

Supplementary Material (ESI) for CrystEngComm  
This journal is © The Royal Society of Chemistry

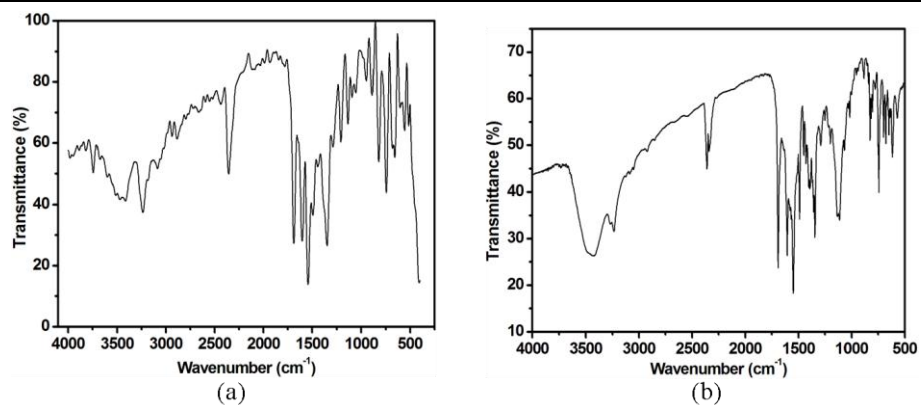

**Fig. S9** (a) The IR spectrum of complex **1**. (b) The IR spectrum of complex **1** after a photocatalysis process.

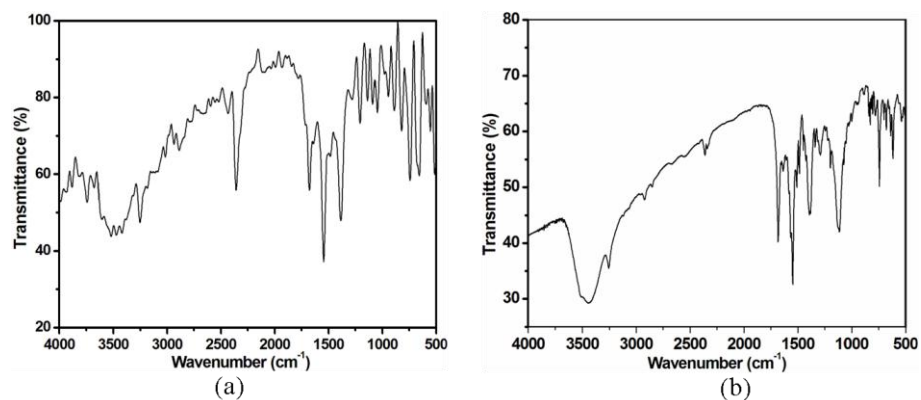

**Fig. S10** (a) The IR spectrum of complex **2**. (b) The IR spectrum of complex **2** after a photocatalysis process.

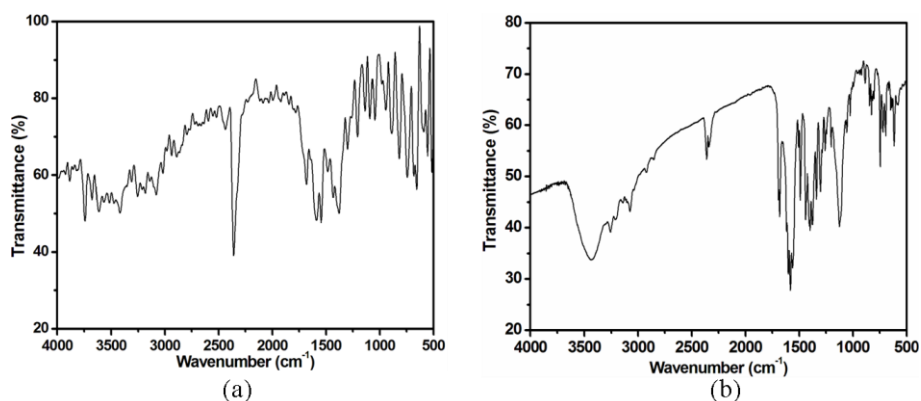

**Fig. S11** (a) The IR spectrum of complex **3**. (b) The IR spectrum of complex **3** after a photocatalysis process.

**Supplementary Material (ESI) for CrystEngComm**  
**This journal is © The Royal Society of Chemistry**

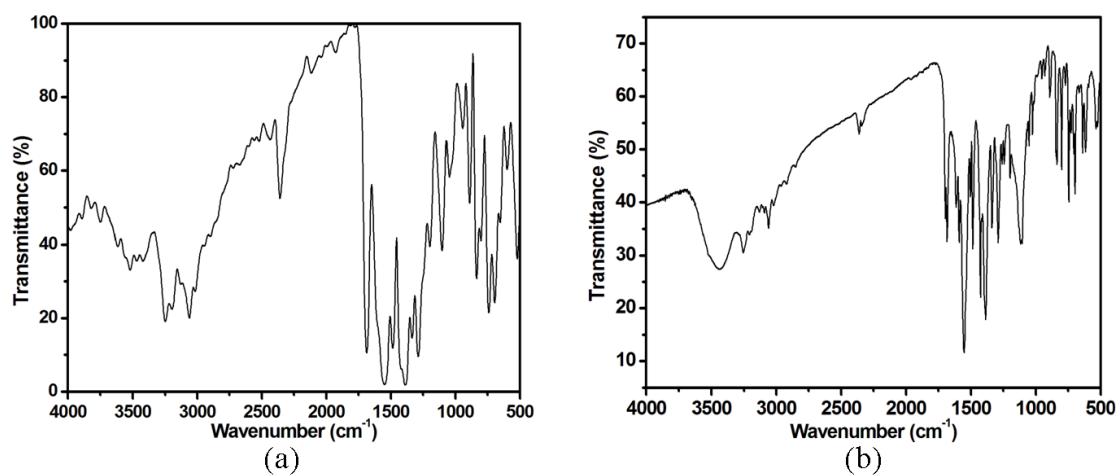

**Fig. S12** (a) The IR spectrum of complex **4**. (b) The IR spectrum of complex **4** after a photocatalysis process.
